# Supplementary material
Source: ML conference proceedings conference paper supplement (https://openreview.net/forum?id=V6XHKFicwc)
Supplement: supplementary_material [file attachment]

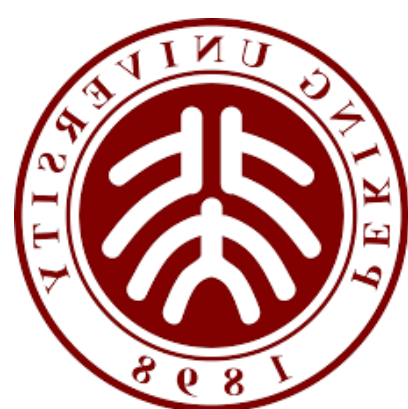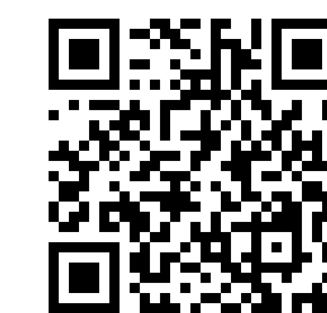

## Introduction

➤ **Task:** Learn to generate dexterous grasping poses in cluttered scenes.

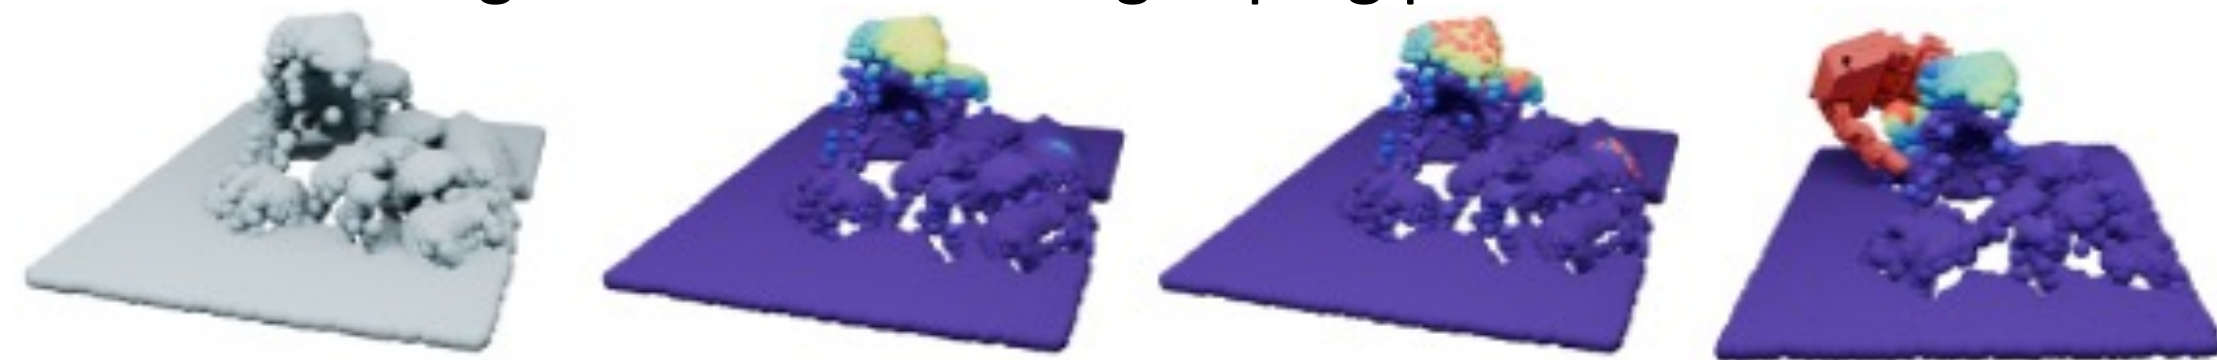

- ① Input: single view scene point cloud    ② Predict per-point graspness  
③ sampled seed points    ④ generate grasps and select the best  
⑤ Our method generates diverse grasp poses in large scale with diverse scenes

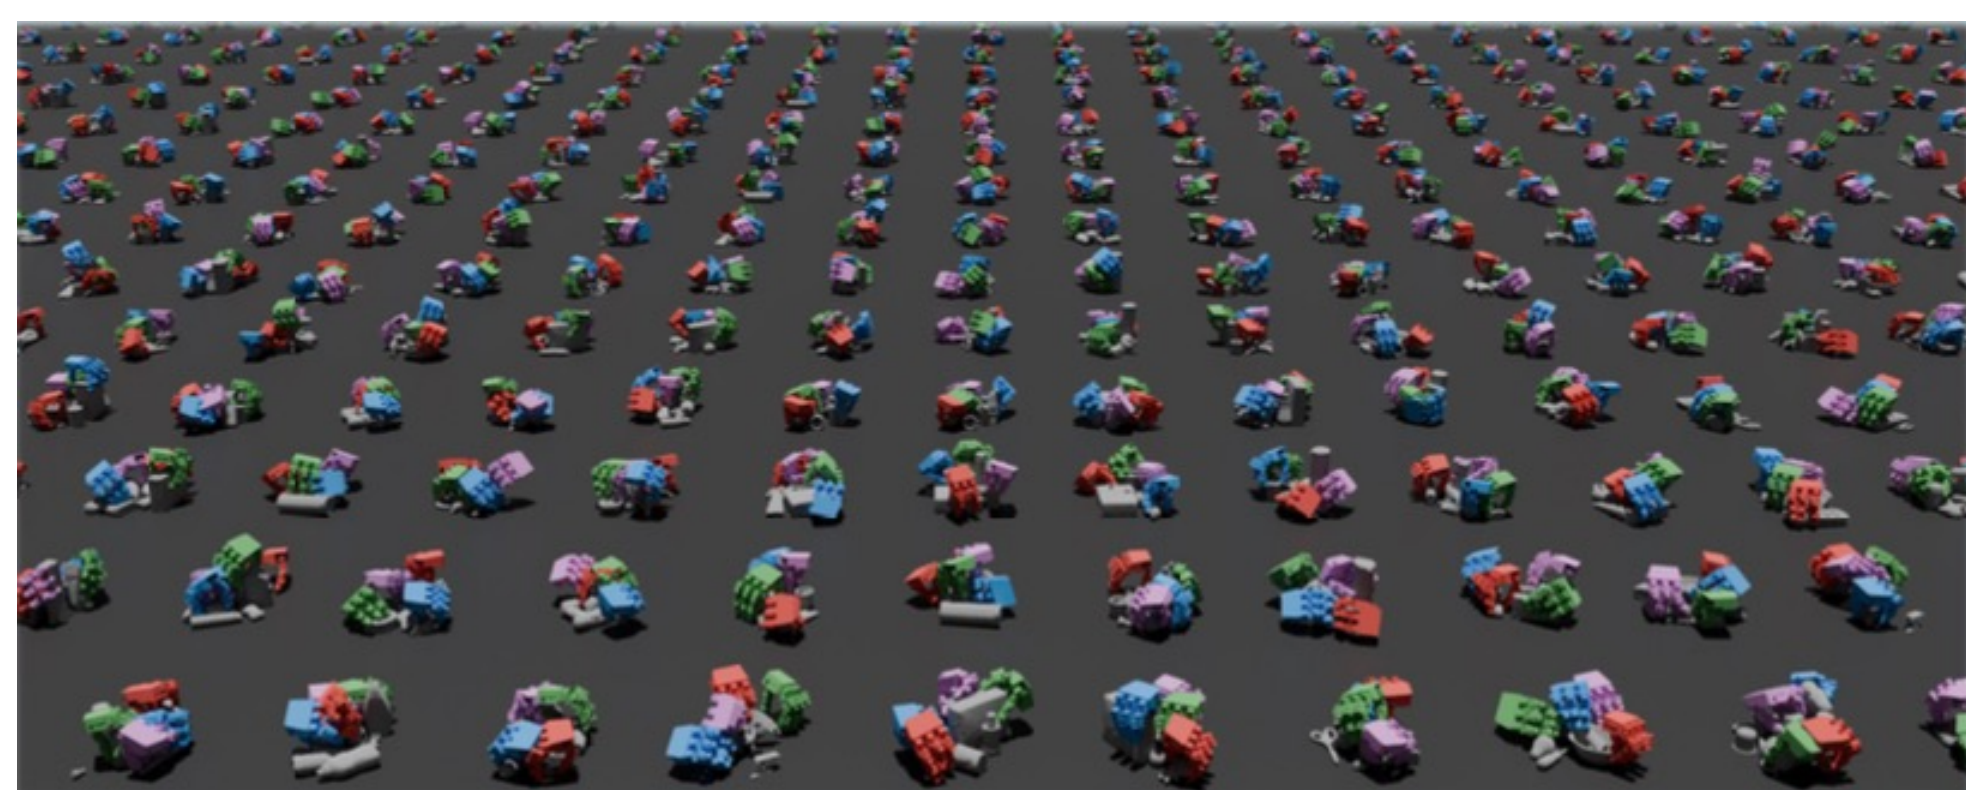

➤ **Motivation:**

- Grasping in cluttered scenes remains highly challenging for dexterous hands due to the scarcity of **data**
- Existing grasp pose detection methods are data-inefficient without utilization of **local geometric features**
- It is unclear how does **scaling the dataset** impact grasping generation performance

## Main contribution

1. Large-scale Benchmark for dexterous grasping in cluttered scenes

- 7500 synthetic training scenes composed with 60 GraspNet-1Billion objects annotated with 426M dexterous grasp poses
- 670 test scenes encompassing 1319 objects and varied cluttery

2. Method

- Initial hand pose retargeted from gripper

- graspness cone retargeted from palm center and midpoint of thumb-middlefinger tip

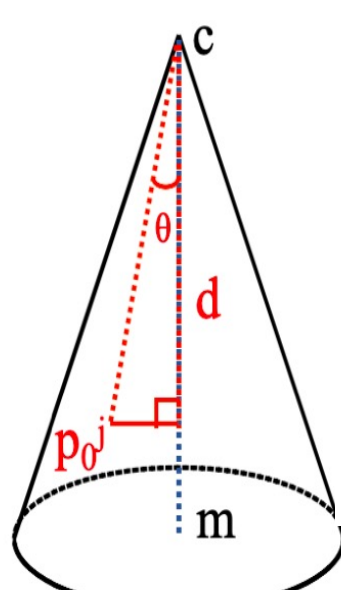

$$f(g_o^i, p_o^j) = \begin{cases} 0 & p_o^j \notin \text{this cone} \\ \exp\left(-\frac{\ln 2}{10} \frac{180}{\pi} \theta - \frac{\ln 2}{0.015} d\right) & p_o^j \in \text{this cone} \end{cases} \quad (2)$$

$$\text{seed\_point}(g_o^i) = \arg \max_{p_o^j \in P_o} f(g_o^i, p_o^j) \quad (3)$$

$$h(g_o^i, p_o^j) = 10^{-150 ||\text{seed\_point}(g_o^i) - p_o^j||_2} \quad (4)$$

$$\text{graspness\_score}(p_o^j) = \ln \left( 0.001 + \sum_{g_o^i \in G_o} h(g_o^i, p_o^j) \right) \quad (5)$$

- Redefine **graspness** as likelihood of a valid grasp exists near the point

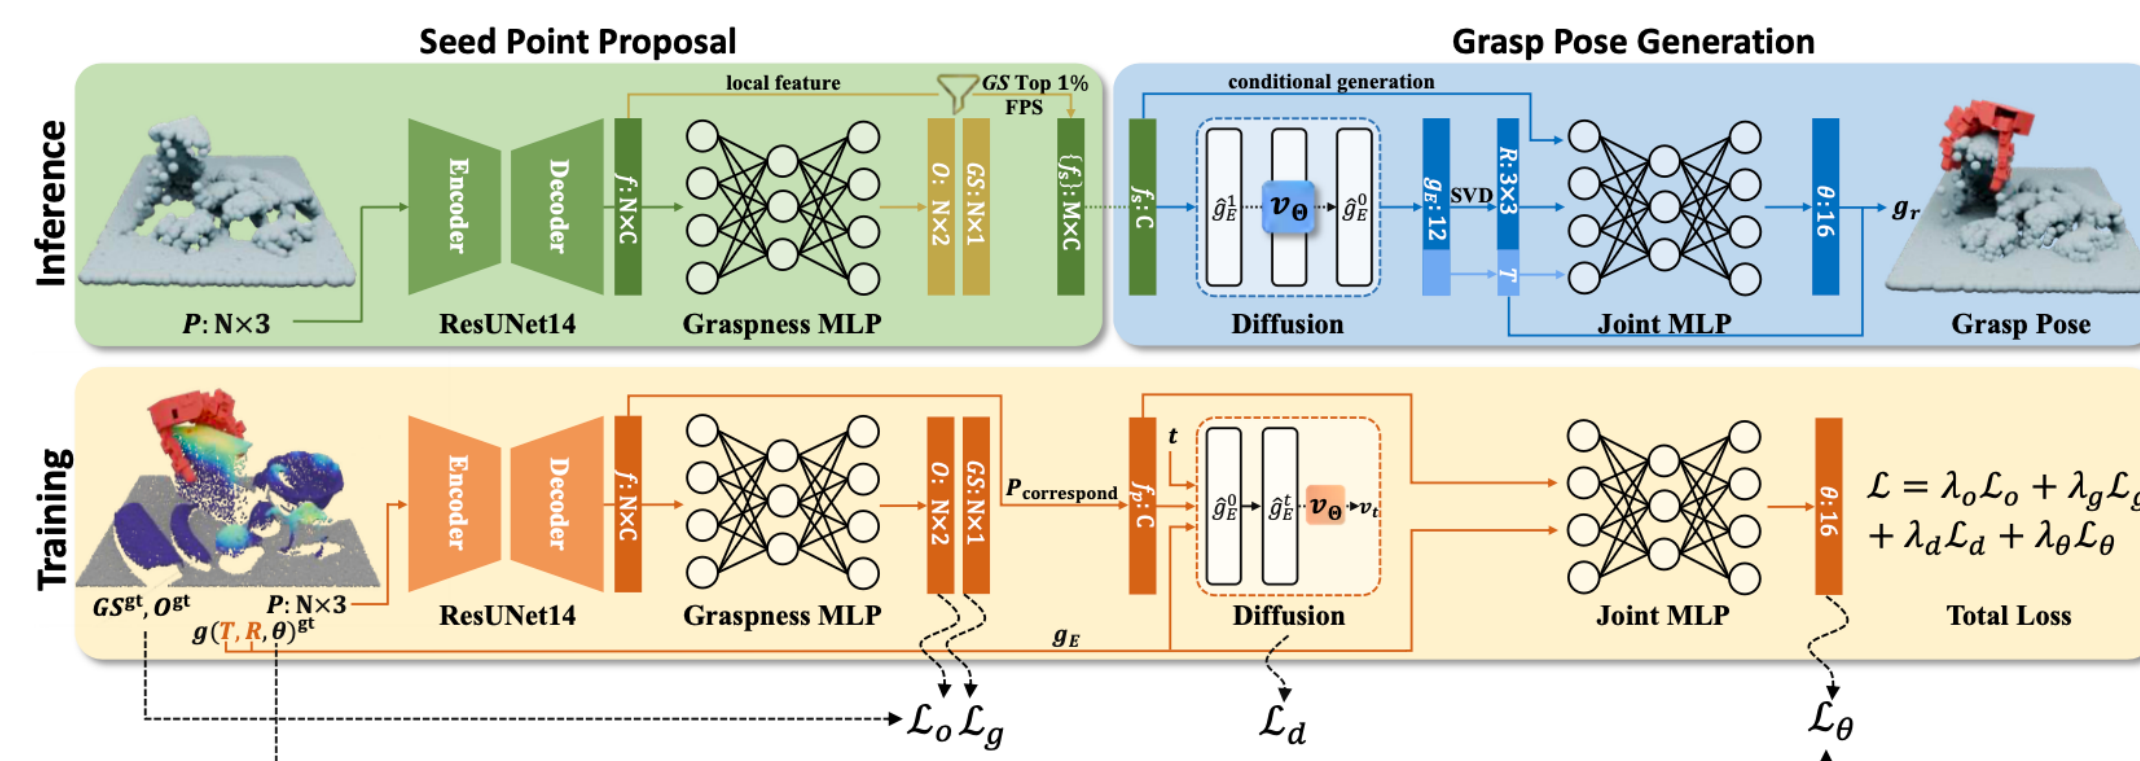

- Propose an end-to-end generative grasp prediction pipeline that first generates wrist **6D pose via diffusion conditioned on local geometric feature**, and **regress hand joint poses conditioned on wrist pose**
- We ablate among different representations of rotation and find the **9D Procrustes SVD** works best with diffusion model.

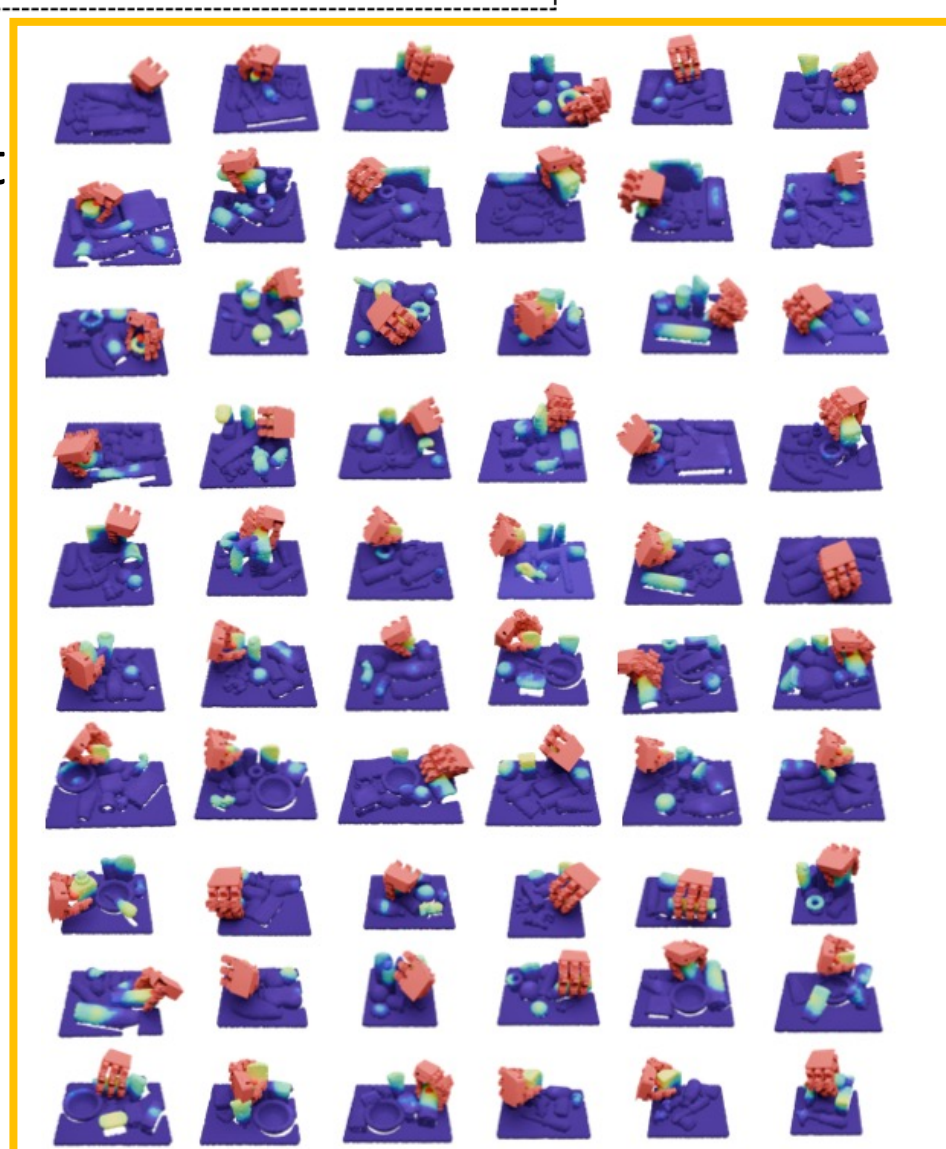

Predicted graspness and best grasp

3. We investigate the effect of **scaling number of grasps / number of scenes used in training set**, and find our model is surprisingly robust to low-data training, meanwhile scales better when the data scales up.

4. We test our model in the **real-world** and achieve **90.7%** success rate in decluttering very challenging scenes. With the help of point cloud restoration, our model can tackle scenarios with mixed diffuse-and-transparent objects.

## Experiment

1. Simulation

| Method                    | GraspNet-1Billion |             | ShapeNet    |             |
|---------------------------|-------------------|-------------|-------------|-------------|
|                           | Dense             | Loose       | Dense       | Loose       |
| HGC-Net [10]              | 46.0              | 26.7        | 46.4        | 30.4        |
| GraspTTA <sup>†</sup> [7] | 62.5              | 42.8        | 56.6        | 46.4        |
| ISAGrasp <sup>†</sup> [4] | 63.4              | 51.4        | 64.0        | 52.7        |
| Ours                      | <b>90.6</b>       | <b>73.2</b> | <b>81.0</b> | <b>74.2</b> |

Dense: 8-11 objects per scene  
Loose: 1-2 objects per scene

Random: 1-10 objects per scene, obtained by randomly masking objects from Dense scenes

2. Ablation

| Method           | GraspNet-1Billion |             |             | ShapeNet    |             |             |
|------------------|-------------------|-------------|-------------|-------------|-------------|-------------|
|                  | Dense             | Random      | Loose       | Dense       | Random      | Loose       |
| local feature    | 16.8              | 10.9        | 4.8         | 21.3        | 17.6        | 10.9        |
| decomposed model | 84.2              | 80.7        | 71.3        | 74.9        | 72.5        | 66.4        |
| random scene     | 90.0              | <b>84.1</b> | 68.2        | 78.9        | 78.8        | 71.3        |
| Ours             | <b>90.6</b>       | 83.7        | <b>73.2</b> | <b>81.0</b> | <b>85.4</b> | <b>74.2</b> |

## 3. Representation of rotation

| Method   | Method      | GraspNet-1Billion |             |             | ShapeNet    |             |             |
|----------|-------------|-------------------|-------------|-------------|-------------|-------------|-------------|
|          |             | Dense             | Random      | Loose       | Dense       | Random      | Loose       |
| Ablation | Euler Angle | 87.6              | 82.0        | 73.0        | 78.0        | 76.4        | <b>75.2</b> |
|          | Axis Angle  | 86.4              | 81.7        | 70.5        | 79.0        | 76.4        | 74.1        |
|          | Quaternion  | 87.9              | 81.5        | 72.0        | 78.6        | 77.0        | 72.9        |
|          | 6D          | 88.2              | 81.5        | 71.9        | 80.2        | 79.0        | 73.0        |
|          | Ours        | <b>90.6</b>       | <b>83.7</b> | <b>73.2</b> | <b>81.0</b> | <b>85.4</b> | 74.2        |

We empirically find **9D Procrustes SVD** works best with our diffusion pipeline

## 4. Scaling the training data

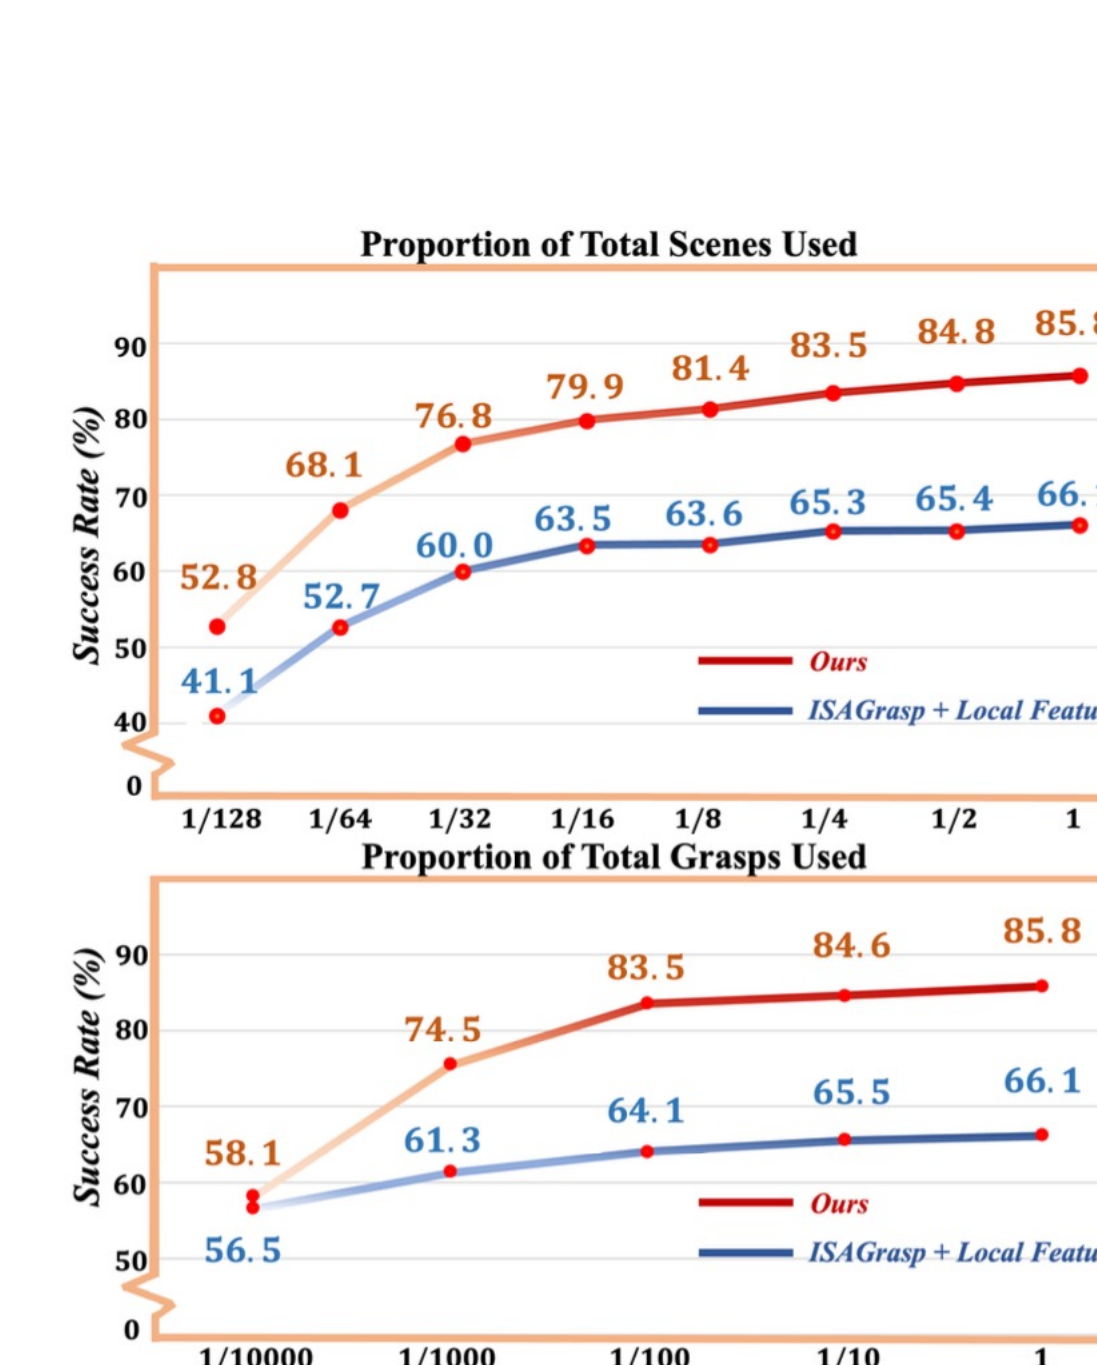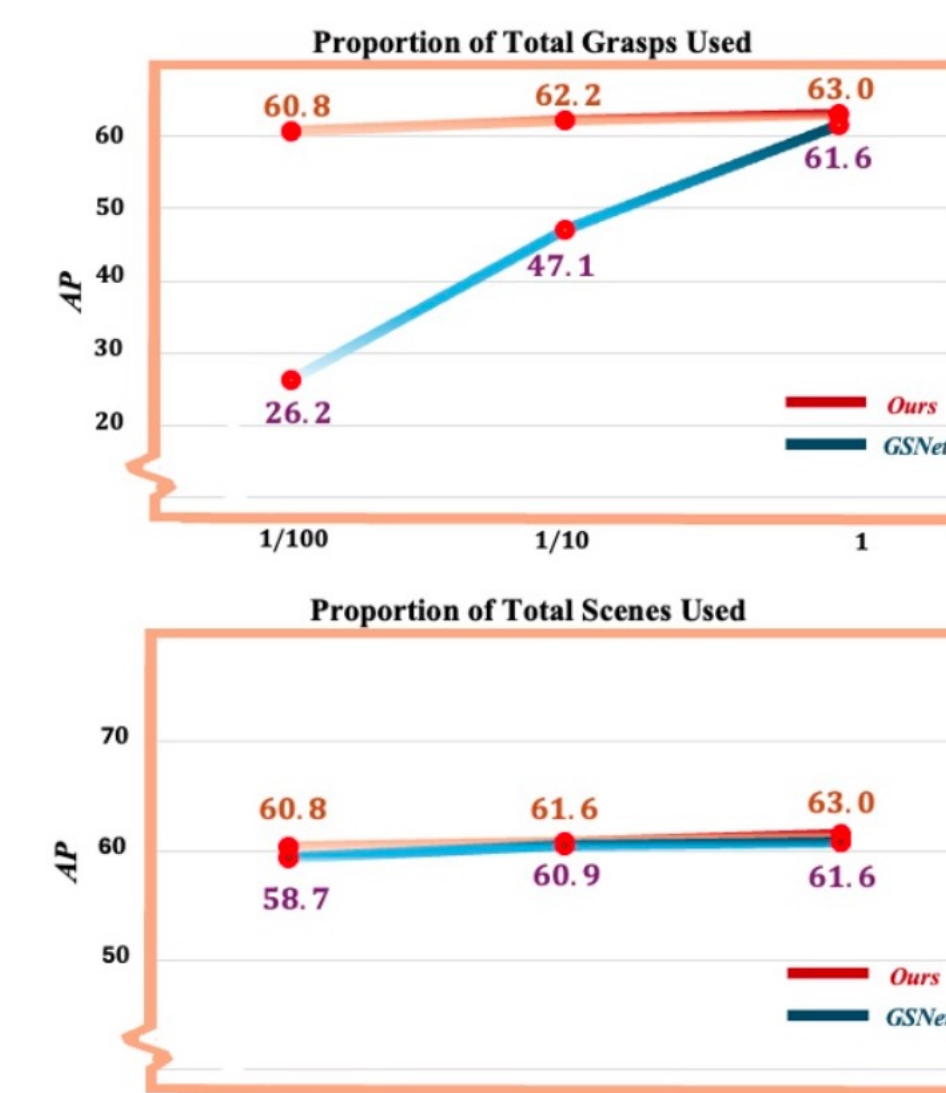

| Fraction of Grasps | Success Rate |
|--------------------|--------------|
| 1/100(42k)         | 81.3         |
| 1(4.2M)            | 92.4         |

## 5. Real-world experiments

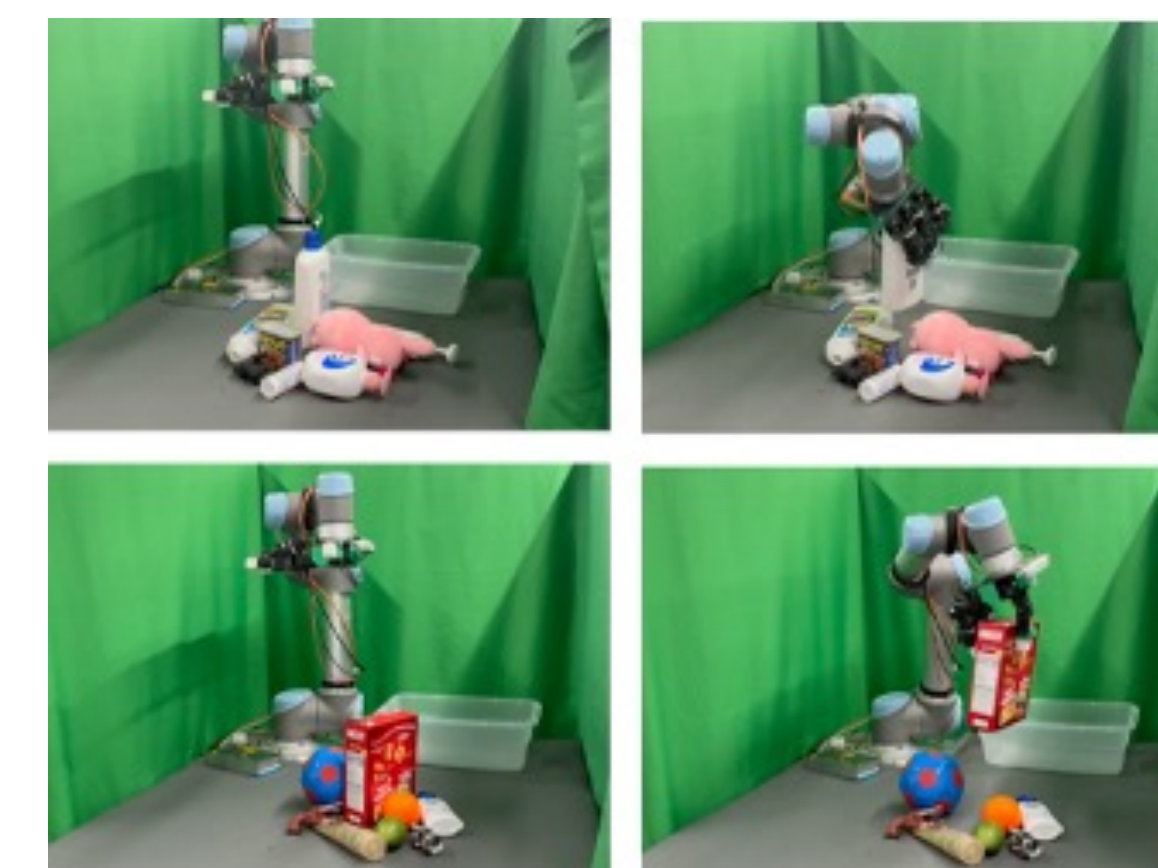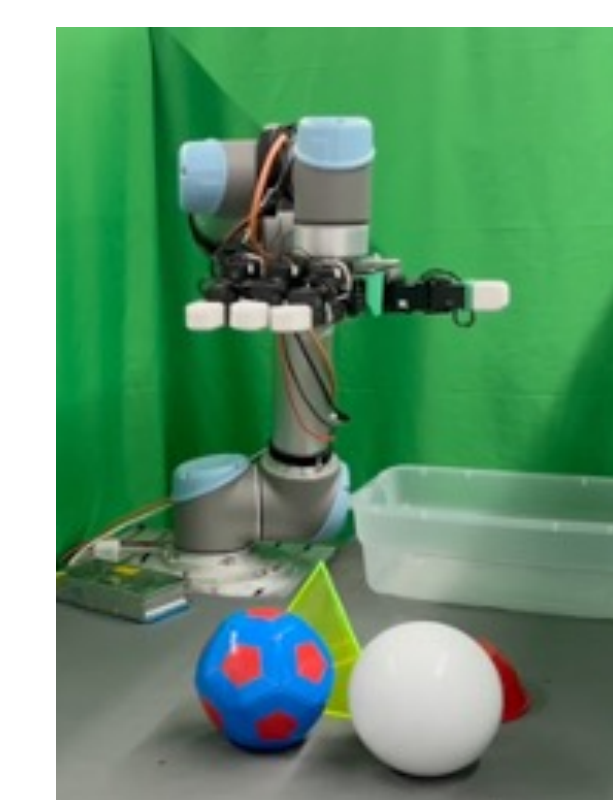

| Method | HGC-Net | Ours         |
|--------|---------|--------------|
| SR (%) | 16.44   | <b>90.70</b> |

| End Effector     | Normal | Large |
|------------------|--------|-------|
| Parallel Gripper | 92.4   | 0.0   |
| Dexterous Hand   | 81.5   | 100.0 |

- 90.7% success rate in cluttered real scenes
- capable to work in scenarios where grippers fail
